# Supplementary material for: High flavonoid diet alleviates chronic stress in cancer patients by optimization of the gut microbiota
Source: Royal Society of Chemistry journal article supplement (doi:10.1039/d5fo02560e), 2025-01-01

Supplementary Table 1. List of fruits and vegetables with high flavonoids content.

| Fruits                                                                                                                                                                            | Vegetables                                                                                                                                                                                                                                                                                |
|-----------------------------------------------------------------------------------------------------------------------------------------------------------------------------------|-------------------------------------------------------------------------------------------------------------------------------------------------------------------------------------------------------------------------------------------------------------------------------------------|
| strawberry, lemon, red apple, kumquat, grape, orange, mulberry, blueberry, hawthorn, plum, pomegranate, longan, peach, cranberries, waxberries, mango, cherry, kiwi fruit, pomelo | douban, radish Leaves, broccoli, sweet pepper, sweet potato leaf, watercress, mulberry anise leaf, lotus root, ginger, eggplant, cabbage, sweet potato, chili (spicy, yellow), celery, onions (white, purple), hawthorn leaves, sesame vegetable, perilla, coriander leaves, white radish |

Supplementary Figure 1. Behavioral experiment (OFT animal model 1)

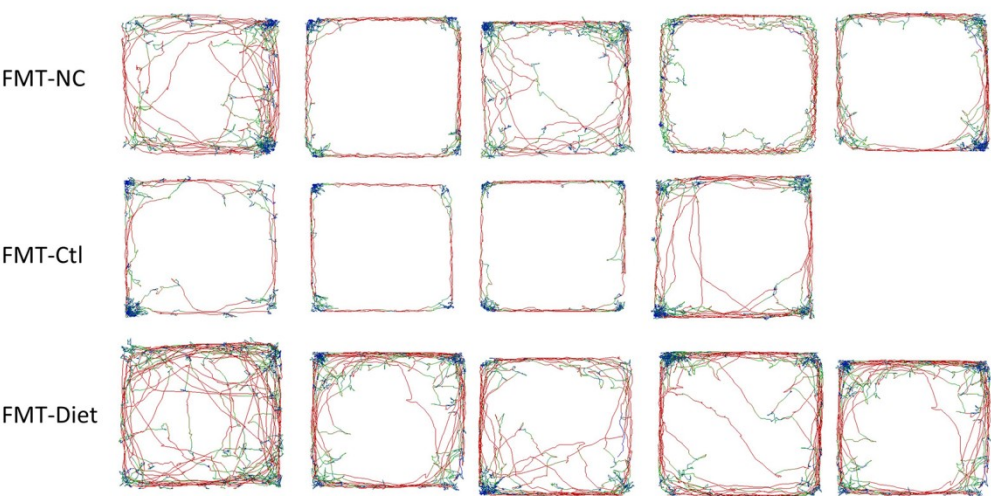

Supplementary Figure 2. Behavioral experiment (OFT animal model 2)

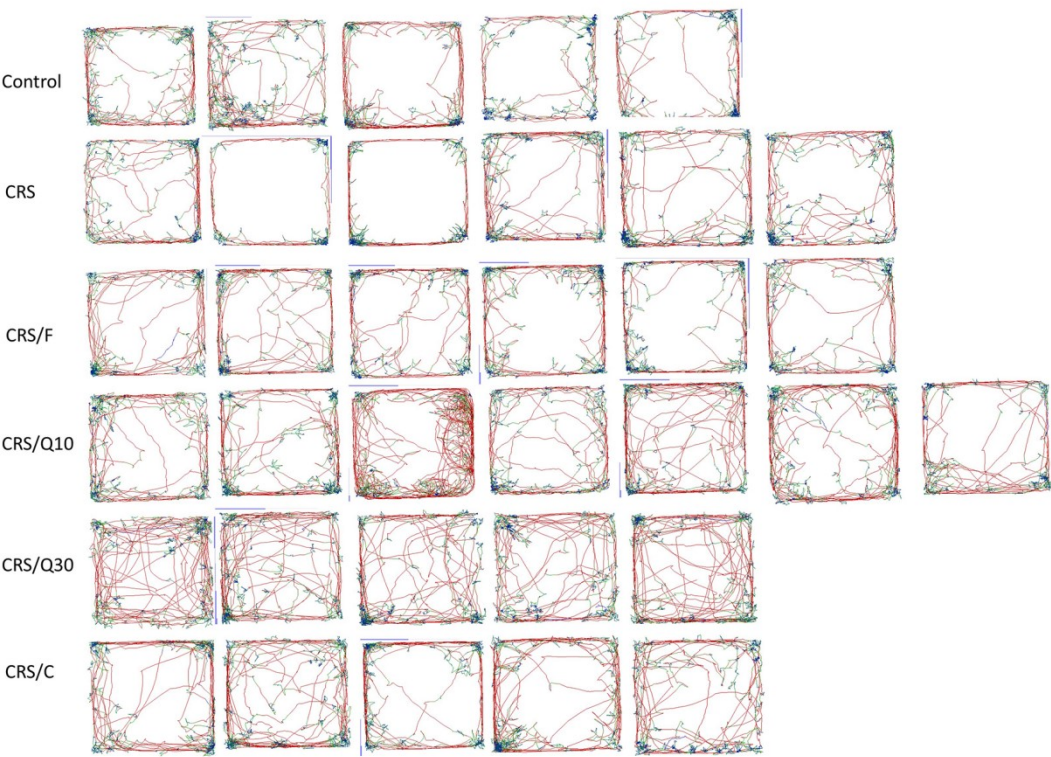

Supplement: d5fo02560e1.pdf [file d5fo02560e1.pdf]
